# Supplementary material
Source: publisher site journal article supplement (https://www.dovepress.com/article/380742)
Supplement: Supplementary file 1 [file get_supplementary_file.php]

**Supplemental Table** Serum liver enzyme parameters in severe and critical patients with COVID‑19 on admission

|  | Severe (n=36) | Critical (n=27) | P-value |
| --- | --- | --- | --- |
| AST (U/L) | 30.55 (22.48, 45.60) | 34.80 (22.60, 69.90) | 0.101 |
| AST, n (%) |  |  | 0.168 |
| Normal | 26 (72.22) | 14 (51.85) |  |
| 1-3 ULN | 10 (27.78) | 12 (44.44) |  |
| ＞3 ULN | 0 | 1 (3.70) |  |
| ALT (U/L) | 29.95 (20.78, 50.70) | 28.50 (18.90, 38.90) | 0.728 |
| ALT, n (%) |  |  | 0.76 |
| Normal | 25 (69.44) | 21 (77.78) |  |
| 1-3 ULN | 9 (25.00) | 5 (18.52) |  |
| ＞3 ULN | 2 (5.56) | 1 (3.70) |  |
| TBIL (umol/L) | 8.65 (6.85, 12.15) | 9.70 (6.90, 14.30) | 0.324 |
| TBIL, n (%) |  |  | 0.354 |
| Normal | 34 (94.44) | 23 (85.19) |  |
| 1-3 ULN | 2 (5. 56) | 3 (11.11) |  |
| ＞3 ULN | 0 | 1 (3.70) |  |
| Albumin (g/L), median (IQR) | 36.60 (34.20, 41.00) | 33.80 (30.90, 38.90) | 0.185 |
| A/G ratio, median (IQR) | 1.10 (1.00, 1.38) | 1.00 (0.90, 1.30) | 0.173 |
| INR (mmol/L), mean (SD) | 1.15 (0.12) | 1.16 (0.13) | 0.749 |

Abbreviations: AST = aspartate aminotransferase, ALT = alanine transaminase, A/G = albumin/ globulin, INR = international normalized ratio, TBIL = total bilirubin

**Supplemental Fig. 1** Caption: Dynamic changes of liver function indicators in different groups.

Fig. a: Description text: Dynamic changes of alanine aminotransferase (ALT) and aspartate aminotransferase (AST) in the normal, abnormal, and liver injury group.

Fig. b: Description text: Dynamic changes of total bilirubin (TBIL) and albumin in the normal, abnormal, and liver injury group.

Fig. c: Description text: Dynamic changes of INR and albumin/globulin (A/G) ratio in the normal, abnormal, and liver injury group.

**Supplemental Fig. 2** Caption: the cycle threshold (Ct) values in different groups.

Fig. a: Description text: the peak Ct values between the severe group and the critical group.

Fig. b: Description text: the peak Ct values in the normal, abnormal, and liver injury group.

**Supplemental Figure 1**

**Supplemental Figure 2**
